# Supplementary material for: Crystallization regulation and protection of quasi-2D perovskite film by copolymer to enhance the stability of perovskite light-emitting diodes
Source: Royal Society of Chemistry journal article supplement (doi:10.1039/d2tc01412b), 2022-01-01
Supplement: d2tc01412b1.pdf [file d2tc01412b1.pdf]

### Supporting information

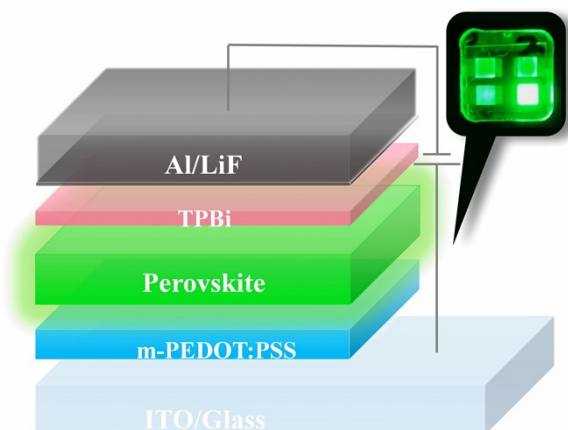

**Fig. S1.** Device architecture of the as-fabricated PeLEDs

**Table S1.** Device performance of the PeLEDs before and after being operated at a constant current density for 90 min.

| PeLEDs based on | $V_{on}$ (V) | Maximum luminance ( $L_{max}$ , cd/m <sup>2</sup> ) | Maximum current efficiency ( $CE_{max}$ , cd/A) | Maximum EQE(%) |
|-----------------|--------------|-----------------------------------------------------|-------------------------------------------------|----------------|
| W/O EVA-Fresh   | 3.4          | 10960                                               | 17.4                                            | 4.6            |
| With EVA-Fresh  | 3.2          | 11673                                               | 22.9                                            | 5.75           |
| W/O EVA-CC      | 4            | 3135.4                                              | 6.31                                            | 1.62           |
| With EVA-CC     | 3.8          | 7762                                                | 7.84                                            | 2.02           |

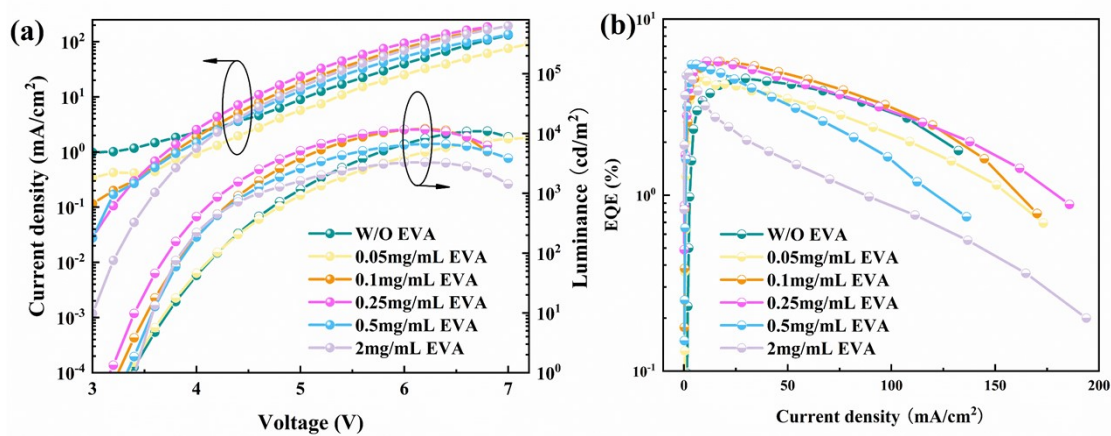

**Fig. S2.** Current density-voltage-luminance curves and EQE characteristic curves of quasi-2D PeLEDs with different concentration EVA

**Table S2.** Device performance of PeLEDs with different concentration EVA

| PeLEDs based on | $V_{on}$ (V) | Maximum luminance ( $L_{max}$ , cd/m <sup>2</sup> ) | Maximum current efficiency ( $CE_{max}$ , cd/A) | Maximum EQE(%) |
|-----------------|--------------|-----------------------------------------------------|-------------------------------------------------|----------------|
| W/O EVA         | 3.4          | 10960                                               | 17.4                                            | 4.6            |
| 0.05 mg/mL EVA  | 3.4          | 8402.6                                              | 18                                              | 4.67           |
| 0.1mg/mL EVA    | 3.4          | 12038                                               | 22.2                                            | 5.75           |
| 0.25mg/mL EVA   | 3.2          | 11673                                               | 22.9                                            | 5.75           |
| 0.5mg/mL EVA    | 3.4          | 6763.4                                              | 21.6                                            | 5.52           |
| 2mg/mL EVA      | 3.6          | 3296.5                                              | 19.4                                            | 4.94           |

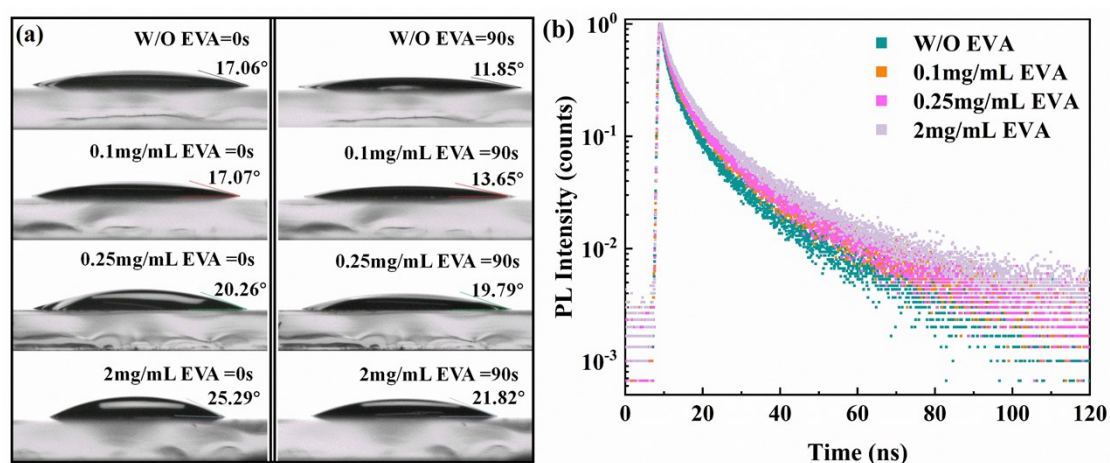

**Fig. S3.** a) Water contact-angle measurement and b) Transient PL decay of quasi-2D perovskite films.

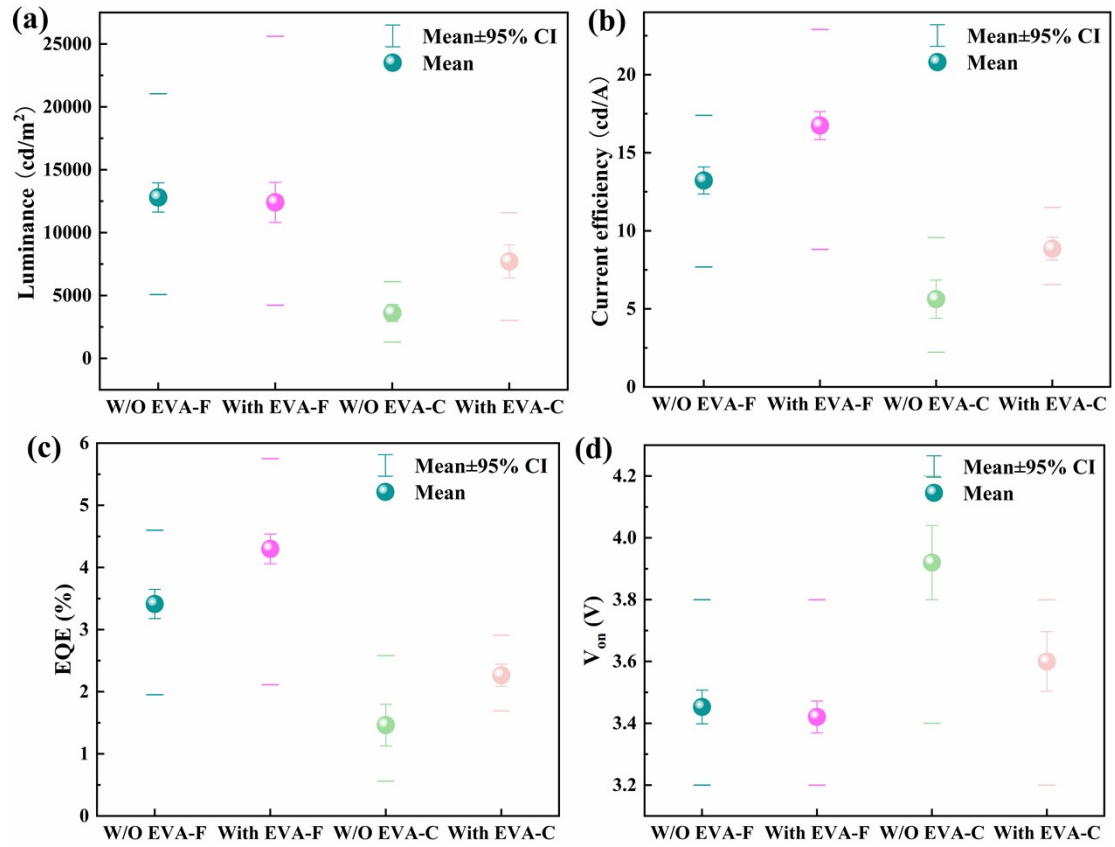

**Fig. S4.** Statistics of luminance, current efficiency, EQE,  $V_{on}$  of 34 devices (fresh, F) and 5 devices (after constant current, C) fabricated with and without EVA.
